# Supplementary material for: Multiple Infections with Viruses of the Family Tymoviridae in Czech Grapevines
Source: MDPI journal article supplement (doi:10.3390/v16030343), 2024-02-23
Supplement: s1 [file s1]

**Table S5: Primers for verification of newly obtained full-length sequences of viruses from the family *Tymoviridae***

Legend: first letter (F or R) indicates direction of primer (forward or reverse)

Next numbers indicate position in the virus genome.

**GRGV OR787584**

F6\_OR787584: CTCAACCAGCCTCATCTCGA

R703\_OR787584: AGGTTGGTCTCGATGGTCCT

F518\_OR787584: CAAGGATACCATAGCGGCCC

R1430\_OR787584: CTTCTGACTTTCGGTGCGGA

F1233\_OR787584: GAAGCCCCCAAGAAGGACTC

R2107\_OR787584: ACAGGGAGATCCTCAGGGAC

F1949\_OR787584: CGCCTACCACCAGTACTTCC

R2830\_OR787584: GTGAGGTGGTCAGTGGTGAG

F2634\_OR787584: TCGTTACTCACCCGTGAACG

R3505\_OR787584: TCGGCTTGGATTGTCAGGTC

F3323\_OR787584: TAAAGTCGGCCTCCCCACTA

R4214\_OR787584: GACGGGGGCATTGAAGAAGA

F4050\_OR787584: CTCCCCCTCATCAAATCCCC

R4900\_OR787584: AGAGTTTGGCAAGCCTTCCA

F4733\_OR787584: CGTCAATGAATTCGCCCAGC

R5619\_OR787584: GATTCTGAGGGAGCAGAGCC

F5419\_OR787584: CCGAAGTTTCTCGCTACGGT

R6302\_OR787584: CTGGTGAGGGAGAGGAAGGG

F6126\_OR787584: CATGGTGGCTCCTCCGAAG

R6841\_OR787584: TTGAAGTGGGGCAAAGCAGA

**GRGV OR787585**

F1\_OR787585: CTCAACCAGCCTCATCTCGA

R726\_OR787585: GCAGAGTGGTGCCAGACATT

F514\_OR787585: CAAGGACACCATAGCCGCC

R1426\_OR787585: CTTCTGACTTTGGGTGCGGA

F1221\_OR787585: CCACTCCTGAAGCTCCCAAG

R2099\_OR787585: GAAGGTCCTCCGGGATGATG

F1941\_OR787585: ATGATGCCGACCACCAGTAC

R2797\_OR787585: CAGCTTGGTTGTCTCCGGAT

F2623\_OR787585: CTCCTTCATGACCCGACAGC

R3502\_OR787585: GGTGGGGTCAGATTGGATGG

F3345\_OR787585: CCGAATGGAAGCGCAATCTC

R4194\_OR787585: TTGAAGAAGACATCCCCGCA

F4019\_OR787585: TTCCCCAAGCAACTCACAGG

R4896\_OR787585: AGAGCAAGGGTCTGGCAAG

F4725\_OR787585: TCAATGAGTTCGCCCAGCTC

R5608\_OR787585: ATTCTCGGGGAGTAGGGTCC

F5413\_OR787585: GGTCTCTCGCCACGGTTTAT

R6318\_OR787585: ATTGGAGGACCGAGTAGGCA

F6120\_OR787585: GTAGCCCCTCCGAAGCTTC

R6819\_OR787585: GGCCAAGCAGAGACTGTGAA

### **GSyV-1 OR787586**

F12\_OR787586: CTGTCTCAACTGCTCTCGCA

R535\_OR787586: CAAACCGTTGGAGGACAGGG

F334\_OR787586: GTCAACATCCCCATCACCGT

R1251\_OR787586: GTCGAACACTGTGCAAGGGA

F1059\_OR787586: CCTCTACCTCTCCGTCACCA

R1948\_OR787586: CTACGAAGCGGGGTTGTCTC

F1746\_OR787586: CCTGAGGCGCTTCTTCTCC

R2640\_OR787586: AGCAATGTCATCTTCGCGGA

F2430\_OR787586: ATTCTTCTACCTGCACCCGG

R3339\_OR787586: CAGACAACCCCTTGGCATCT

F3160\_OR787586: CGCGCATTCAAGCACTTCAA

R4046\_OR787586: TCACGAAGAACGATGGAGGC

F3863\_OR787586: AAGTCGACCTTCGTGCTCTC

R4724\_OR787586: AGAGTTTGGCAAGCCTTCCA

F4530\_OR787586: TGAAGCTCTTTTCGCGGAGT  
R5427\_OR787586: GAGACTGTGCCCAATGGAGA

F5259\_OR787586: GAAGGAGAAGTCCCGCTACG  
R6117\_OR787586: CACGGTGTTGAAGGTCCAGA

F5960\_OR787586: TCTTCACCGTTGATCCTGCC  
R6477\_OR787586: AACAAACAAACGGAAAAGAAAACA

**GSyV-1 OR787587**

F12\_OR787587: CTGTCTCAACTGCTCTCGCA  
R535\_OR787587: CAAACCGTTGGAGGACAGGG

F334\_OR787587: GTCAACATCCCCATCACCGT  
R1251\_OR787587: GTCGAACACTGTGCAAGGGA

F1031\_OR787587: TCAAAACCACCACCATTCGC  
R1948\_OR787587: CTACGAAGCGGGGTTGTCTC

F1738\_OR787587: TTCCCTTTTCTGAGGCGCTT  
R2616\_OR787587: GGAGTCCGGGAAGTAACAGC

F2440\_OR787587: CTTCACCCCGCTGATTGGAT  
R3339\_OR787587: CAGACAACCCCTTGGCATCT

F3160\_OR787587: CGCGCATTCAAGCACTTCAA  
R4046\_OR787587: TCACGAAGAACGATGGAGGC

F3863\_OR787587: AAGTCGACCTTCGTGCTCTC

R4726\_OR787587: CGAGGGTTTGGCAAGCTTTC

F4548\_OR787587: GTGCAGAGCTCTCAACGAGT

R5427\_OR787587: GAGACTGTGCCCAATGGAGA

F5259\_OR787587: GAAGGAGAAGTCCCGCTACG

R6123\_OR787587: AGGCTCCACAGTGTTGAAGG

F5960\_OR787587: TCTTCACCGTTGATCCTGCC

R6478\_OR787587: AACAAACAAACGGAAAAGAAAACA

### **GRV FV OR787588**

F19\_OR787588: AAGTGCACCTTGACTCTAGC

R603\_OR787588: GGAAATGGGAACTGGCTCCA

F419\_OR787588: TCCCTTCTCTCTTCCGTCGT

R1285\_OR787588: CGAGGCGATAGATGAGCTGG

F1095\_OR787588: TTGGTTCATGCACGACTCCA

R1975\_OR787588: CAAGGCTGAACCGAGGGTAG

F1810\_OR787588: GCCTCCGCTTCTCTTATGCT

R2696\_OR787588: GCACCAGAGGAGTCGATCAT

F2512\_OR787588: GAAGCCAAGCCTCCTGTTCT

R3374\_OR787588: ATGTGGATGAGCGAAACGGT

F3197\_OR787588: ACTCTTACACCTCGCACGTG

R4077\_OR787588: GGACAGATCGCCAGTGAACA

F3910\_OR787588: AACGATTGTGGCTTTGCTGC  
R4790\_OR787588: AAGATGCGAACAGCTGACCA

F4585\_OR787588: GAGATTCTGGGGTCCCTCCT  
R5472\_OR787588: GTCGAGGCACACCATGAGTT

F5283\_OR787588: TGGCGATGACTCCCTTCTTG  
R6205\_OR787588: AGACGCAATGGAGAGTGACG

F6018\_OR787588: CATCCCCTTCCAGTGGGTTG  
R6578\_OR787588: TAAAGCACACCAAGGTCGCT

#### **GRV FV OR787589**

F11\_OR787589: AGCTCTCGCTACACTCAAGT  
R656\_OR787589: GAGAGCAGGTCGGTAAAGCC

F455\_OR787589: CTCTCTCCTCGCCGACTTCC  
R1377\_OR787589: AGCTCTCCAGGCGAGTTCTA

F1185\_OR787589: GAGTCCTCCTTCACCGACCT  
R2077\_OR787589: CGACGGGGTAAGAATCGCTT

F1874\_OR787589: CTACCTCATTGGATCCCCGC  
R2764\_OR787589: CGAGAAGGGAAAGAACCGCT

F2557\_OR787589: CTGATGACCTTCTGAGCCCC  
R3442\_OR787589: TAATTGCGACAGGGCTTGGT

F3257\_OR787589: CGGCGTCCTTGCTAACCTAG

R4158\_OR787589: AAGGGAAGAGAGAGCGGAGT

F3956\_OR787589: CTACAATCACCCAGCCTGCA

R4875\_OR787589: TAGCTTGGGTCTTGCTGCTC

F4656\_OR787589: CTCCTCAAGGCCTCCATCG

R5550\_OR787589: AGTAACCACAGAACTCGCCG

F5374\_OR787589: ATTTGCGCCGTTCTGCATCTG

R6244\_OR787589: TTTTTC AACGTGGTGGAGGC

F6057\_OR787589: CCCACTTCTGGTCGTCCTTC

R6713\_OR787589: GCACACCAAGGTCACCTTACG
