# Supplementary material for: Multiple Infections with Viruses of the Family Tymoviridae in Czech Grapevines
Source: Viruses. 2024 Feb 23;16(3):343. doi: 10.3390/v16030343 (PMC10975331; doi:10.3390/v16030343)
Supplement: Supplementary file 1 [file viruses-16-00343-s001.zip › Tables S1-S4.xlsx]

## Sheet: Table S1
Table S1: List of reference sequences used for mapping
virus/viroid detected	Reference sequence
Grapevine Syrah virus 1	NC_012484
	FJ436028
	KP221255
Grapevine Red Globe virus	NC_030693
	MZ451070
	KX171167
Grapevine rupestris vein feathering virus	NC_034205
	MZ451085
	MT084814
Grapevine leafroll-associated virus 1	KY827404
Grapevine rupestris stem pitting associated virus-1	NC_001948
Grapevine virus A	NC_003604
Grapevine virus B	NC_003602
Grapevine fleck virus	NC_003347
Grapevine Pinot gris virus	NC_015782
Hop stunt viroid	NC_001351
Grapevine yellow speckle viroid 1	NC_001920

## Sheet: Table S2
Table S2: List of primers used for virus detection
Virus	Primer name	Primer sequence
GSyV-1	F	CGACGCAGGCGTCATTGCG
	R	CCGTCTGCTGACCAGCCTG
GFkV	F	CGACGCAGGCGTCATTGCG
	R	CCGTCTGCTGACCAGCCTG
GRVFV	F	ATGTTGGTCTTCACGTGSAC
	R	GTCCTCGGCCCAGTGAAAA
GRSPaV	F	CACATRTCATCVCCYGCAAA
	R	AGRYTTAGRGTRGCTAARGC
GLRaV-1	F	TGGCATCGTTGCTAAATTGAG
	R	AATCCTATGCGTCAGTATGC
GPGV	F	CTGAGAAGCATTGTCCCATC
	R	ATTGCGGAGTTGCCTTCAAG
GVA	F	TCGAACATAACCTGTGGCTC
	R	GAGGTAGATATAGTAGGACCT
GVB	F	GTGCTAAGAACGTCTTCACAGC
	R	AGTAGCCCTTCGTTTAGCCGC
HSVd	F	GTTGGAAGACGAACCGAGAG
	R	GGGCAACTCTTCTCAGAATCC
GYSVd-1	F	ACTTCATGGTGGTGCCGGTG
	R	CCAATGGGTCGCACTTGTTG

## Sheet: Table S3
Table S3: List of accession numbers used for phylogenetic studies
Virus	Accession number	Host	Origin
GFkV	OR701334	Vitis sp.	Czech Republic
	OR826245
	OR826246
	OR826247
	OR826248
	OR826249
	OR826250
	OR826251
	OR826252
	OR826253
	OR826254
	OR826255
	OR826256
	OR826257
	OR826258
	MW246582		USA
	MW246581
	MN716779
	MW246579
	MW246583
	MW246580
	MW246577
	MW246576
	MW246578
	MN716764
	ON567255		Russia
	ON584186
	ON584184
	ON584180
	ON584185
	ON584179
	ON584187
	ON584183
	ON567254
	ON567253
	ON584178
	AB222860		Japan
	AB222861
	NC_003347		Italy
	AJ249363
	ON187033		UK
	ON221466		Switzerland
GRGV	OR787584	Vitis sp.	Czech Republic
	OR787585
	MZ451070		Canada
	MZ451071
	MZ451072
	MZ451073
	MZ451074
	MZ451075
	MZ451066
	MZ451067
	MZ451068
	MZ451069
	MZ344581
	NC_030693		Spain
	KX109927
	KX171167
	LC704876		Japan
	LC704878
	ON221463		Switzerland
GRVFV	OR787588	Vitis sp.	Czech Republic
	OR787589
	NC_034205		France
	KY513701
	MF000325		New Zealand
	MF000326
	AY706994		USA
	MZ027155
	KX828705		Brazil
	MT454063		India
	ON603919		Portugal
	ON603920
	LC619667		Japan
	KY513702		Switzerland
	MZ344582	Vitis sp.	Canada
	MZ451076	Prunus
	MZ451077
	MZ451078
	MZ451079
	MZ451081
	MZ451082
	MZ451083
	MZ451085
	MZ451086
	MZ451087
	MZ451088
	MZ451089
	MZ451090
	MZ451091
	MZ451092
	MZ451093
	MZ451094
	MZ451095
	MZ451096
	MZ451097
	MZ451098
	MZ451100
	MZ451101
	MZ451102
	MZ451103
	MZ451104
	MZ451105
	MZ451106
	MZ451107
	MZ451108
	MZ451109
	MZ451110
	MN974273	Vitis sp.	Australia
	MN974274
	MN974275
	MN974276
	MT084807
	MT084808
	MT084809
	MT084811
	MT084812
	MT084813
	MT084814
GSyV-1	OR787586	Vitis sp.	Czech Republic
	OR787587
	KP221255
	KP221256		Slovakia
	KP221257
	KR153306		Brazil
	KX130754
	JX513896		USA
	NC_012484
	ON221449		Switzerland
	MZ440699		Canada
	MZ440700
	MZ440701
	MZ440702
	MZ440703
	MZ440704
	MZ440705
	MZ440706
	MZ440707
	MZ440708
	MZ440709
	MZ440710
	MZ440711
	MZ440712
	MZ440713
	MZ440714
	MZ440715
	MZ440716
	MZ344583
	MZ344579
GAMaV	OR826259	Vitis sp.	Czech Republic
	KY123917		France
	MK253012		France
	MH061348		Italy
	MH061349		Italy
	AJ249357		USA
	NC_031692		USA
	MZ344576		Canada
	AB276378		Japan
	ON583999		Switzerland

## Sheet: Table S4
Table S4: Recombination events detected in each dataset
Virus	Event	Recombinant	Start/End	Major	Minor	Algorithms
GRGV	1	OR787585	1338-6424	OR787584	MZ451074	BMCST
		KX171167
GRVFV	1	MZ451088	6255-6504	MZ451092	MZ451091	RGBST
	2	AY706994	5994-6244	MZ451098	MZ451107	RGBMT
	3	MN974276	1296-3162	MZ344582	MZ451102	RBMCST
	4	MZ451087	5881-6397	MZ451091	MZ451092	RGBT
	5	OR787588	1640-1853	MZ451085	LC619667	RBMC
G-SyV-1	1	KP221255	1-768	MZ440704	MZ440703	RGBMCST
		OR787586
		OR787587
	2	KP221257	1-820	MZ440700	MZ440715	RGBMCST
	3	KP221256	1-682	MZ440704	MZ440710	RGBMCST
	4	KP221255	3926-4612	MZ440704	MZ440699	RGBMCST
		OR787586
		OR787587
	5	KP221257	4606-5366	MZ440700	MZ440712	RBMCST
	6	JX513896	5881-6397	NC012484	KP221257	RGBMCST
	7	KP221256	3344-3964	MZ440704	MZ440705	RGBMCST
	8	KP221255	6096-6504	MZ440713	MZ440707	RGBCST
		OR787586
		OR787587
	9	KP221256	1110-1288	KR153306	MZ440705	RGBT
	10	OR787586	4986-5148	OR787587	MZ344583	RGBMCST
	11	MZ440699	4612-5230	MZ440708	MZ440713	RBMCT
	12	OR787586	2079-2533	OR787587	KP221257	GMCST
